# Supplementary material
Source: PubMed Central journal article supplement (PMC3819181)
Supplement: NIHMS520479-supplement-2.pdf [file NIHMS520479-supplement-2.pdf]

Supplemental Figure 1.

A.

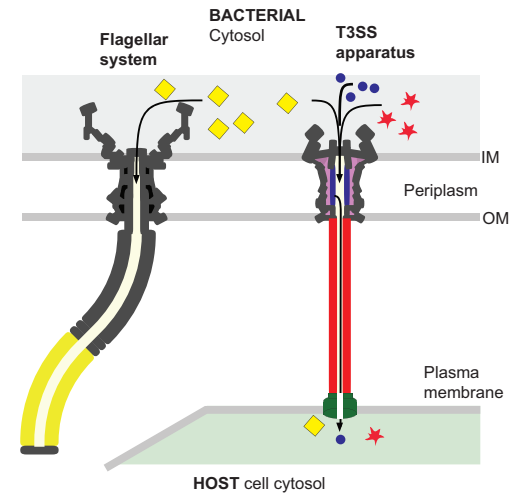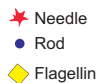

IM Inner Membrane

OM Outer Membrane

B.

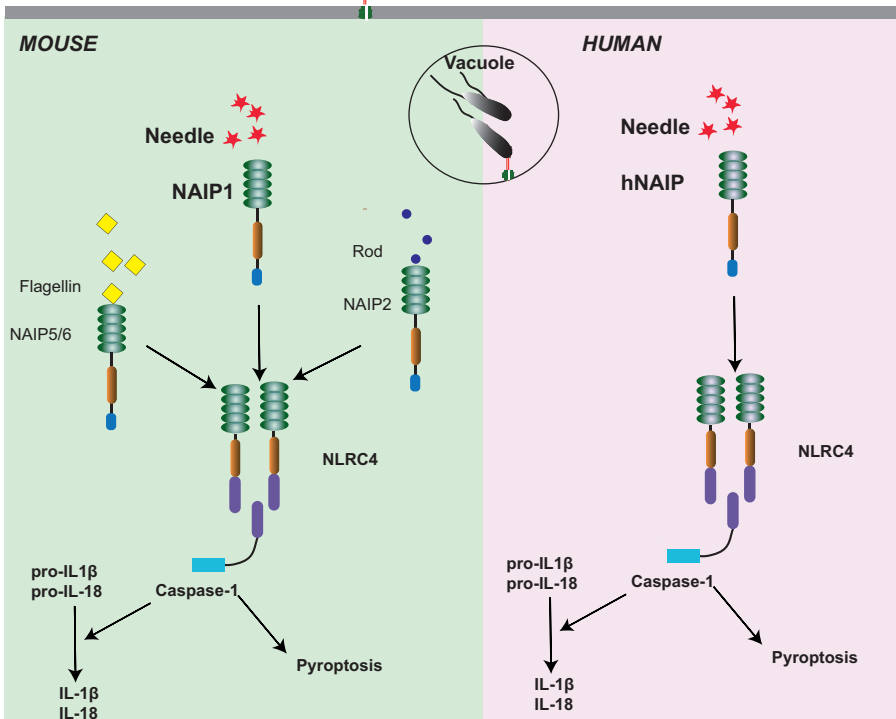

Leucine-rich repeat (LRR)

NBD

BIR domain

CARD

Caspase 1
